# Supplementary material for: Serum bilirubin level is associated with exercise capacity and quality of life in chronic obstructive pulmonary disease
Source: Springer Nature journal article supplement (doi:10.1186/s12931-019-1241-5), 2019-12-01
Supplement: MOESM1 [file 17486858]

## Variability of bilirubin

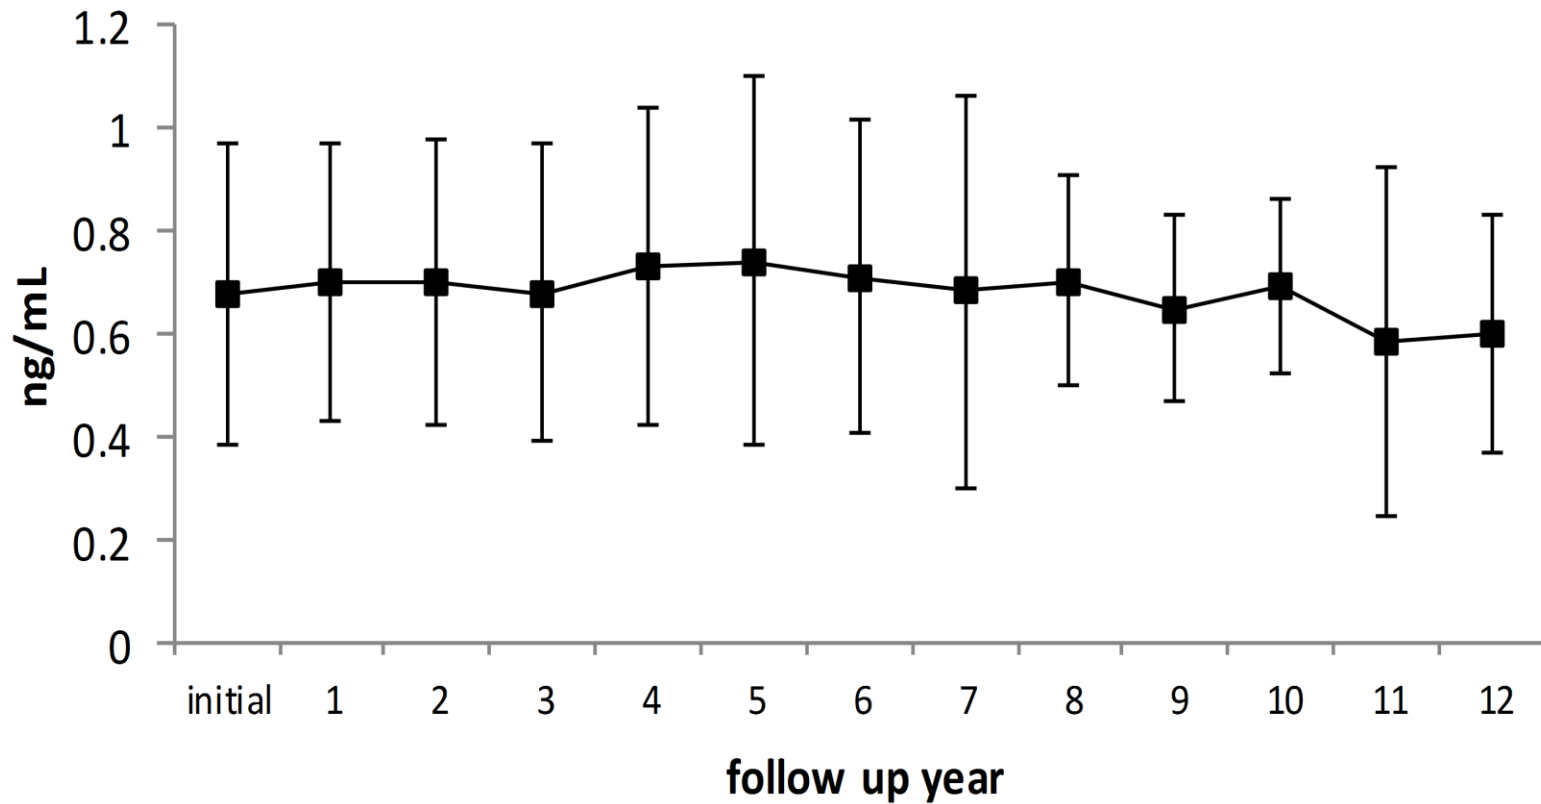

**Additional file 1.** Serum bilirubin levels over the follow-up period

Serum bilirubin levels did not vary between the visits over the follow-up period.
